# Supplementary material for: Early Improvements in Disease Activity Indices Predict Long-Term Clinical Remission Suggested by the Treat-to-Target Strategy in Patients with Ankylosing Spondylitis Receiving TNF-α Inhibitor Treatment
Source: MDPI journal article supplement (doi:10.3390/jcm10184279), 2021-09-21
Supplement: s1 [file s1]

**Table S1** Response to treatment with tumor necrosis factor- $\alpha$  inhibitor as measured by the criteria of the Ankylosing Spondylitis Disease Activity Score (ASDAS), low Bath Ankylosing Spondylitis Disease Activity Index with normal C-reactive protein level (BASDAI-CRP), and at least 50% improvement in the Bath Ankylosing Spondylitis Disease Activity Index (BASDAI<sub>50</sub>).

|                            | 3 months          | 9 months          | 15 months         | 21 months         | 27 months         | 33 months         |
|----------------------------|-------------------|-------------------|-------------------|-------------------|-------------------|-------------------|
| <b>ASDAS-ID</b>            | 32.4<br>(44/136)  | 46.8<br>(59/126)  | 50.8<br>(60/118)  | 55.8<br>(63/113)  | 55.4<br>(62/112)  | 68.9<br>(71/103)  |
| <b>ASDAS-MI</b>            | 55.3<br>(73/132)  | 66.4<br>(81/122)  | 69.0<br>(78/113)  | 70.4<br>(76/108)  | 73.8<br>(79/107)  | 75.5<br>(74/98)   |
| <b>ASDAS-CII</b>           | 88.6<br>(117/132) | 95.9<br>(117/122) | 95.6<br>(108/113) | 95.4<br>(103/108) | 96.3<br>(103/107) | 96.9<br>(95/98)   |
| <b>BASDAI-CRP</b>          | 39.9<br>(55/138)  | 58.7<br>(74/126)  | 65.3<br>(77/118)  | 69.0<br>(78/113)  | 70.5<br>(79/112)  | 75.2<br>(79/105)  |
| <b>BASDAI<sub>50</sub></b> | 76.3<br>(106/139) | 92.2<br>(118/128) | 94.2<br>(113/120) | 93.8<br>(106/113) | 93.8<br>(105/112) | 98.1<br>(103/105) |

ASDAS-ID, Ankylosing Spondylitis Disease Activity Score Inactive Disease; ASDAS-MI, Ankylosing Spondylitis Disease Activity Score major improvement; ASDAS-CII, Ankylosing Spondylitis Disease Activity Score clinically important improvement; BASDAI-CRP, low BASDAI and normal CRP level; BASDAI<sub>50</sub>, 50% improvement in BASDAI.
