# Supplementary material for: Early Improvements in Disease Activity Indices Predict Long-Term Clinical Remission Suggested by the Treat-to-Target Strategy in Patients with Ankylosing Spondylitis Receiving TNF-α Inhibitor Treatment
Source: J Clin Med. 2021 Sep 21;10(18):4279. doi: 10.3390/jcm10184279 (PMC8469764; doi:10.3390/jcm10184279)
Supplement: Supplementary file 1 [file jcm-10-04279-s001.zip]

Archive with 6 entries (6 files):
- Figure S1-J Clin Med.pdf
- Figure S2-J Clin Med.pdf
- Figure S3-J Clin Med.pdf
- Figure S4-J Clin Med.pdf
- Figure S5-J Clin Med.pdf
- Supplemental_Table_S1_J Clin Med.pdf
